# Supplementary material
Source: PubMed Central journal article supplement (PMC3257895)
Supplement: mmc1.pdf [file mmc1.pdf]

The American Journal of Human Genetics, Volume 90  
Supplemental Data

## **Mutations in *RIPK4* Cause the Autosomal-Recessive Form of Popliteal Pterygium Syndrome**

Ersan Kalay, Orhan Sezgin, Vasant Chellappa, Mehmet Mutlu, Heba Morsy, Hulya Kayserili, Elmar Kreiger, Aysegul Cansu, Bayram Toraman, Ebtessam Mohammed Abdalla, Yakup Aslan, Shiv Pillai, and Nurten A Akarsu

Table S1. Sequences and Amplification Conditions for the Primers Used for Exon Amplification and Sequence Analysis

| Exon   | Forward Primer (5'-3')  | Reverse Primer (5'-3') | Amplicon Size (bp) | Annealing Temp. (°C) | Annealing Time (s) |
|--------|-------------------------|------------------------|--------------------|----------------------|--------------------|
| Exon 1 | ctattcatccgcccgcagtc    | cctcgccggcaattggtttc   | 488                | 58                   | 60                 |
| Exon 2 | cgtgatgtgacattgaagtgtg  | tcaagctctttcctccaagaag | 578                | 58                   | 60                 |
| Exon 3 | ctacctggagaggcacagacac  | aaactcctgggctcaagtaatc | 496                | 58                   | 60                 |
| Exon 4 | tgacatctgagctatcaacatgc | ttctgcatgcaaattacacc   | 395                | 58                   | 60                 |
| Exon 5 | gtcgattcaaaaccaggaaac   | tgttacacgcctgtttctcac  | 487                | 58                   | 60                 |
| Exon 6 | ggtgaggccttcaaatgattac  | catgggacctacattctaattg | 469                | 58                   | 60                 |
| Exon 7 | aggttatctgattgcttccag   | gacataagacggagccaaatg  | 588                | 58                   | 60                 |
| Exon 8 | ttaatcacgaggcacagacaac  | agcacaacgaaatgattctgac | 1592               | 58                   | 60                 |
| Exon 8 | gatgaggaccagtggacagc    | gctcgtcgaacaggtaatg    | sequencing primers |                      |                    |

Table S2. Sequences and Amplification Conditions for the Primers Used for ARMS Screening of c.362T>A and c.551C>T Mutations

| Mutation | Primer                    | Primer Sequence (5'-3')            | Amplicon Size (bp) | Annealing Temp. (°C) | Annealing Time (s) |
|----------|---------------------------|------------------------------------|--------------------|----------------------|--------------------|
| c.362T>A | Common primer             | cagggagcgcgatggagcttttgaagaagccaag | 216                | 58                   | 30                 |
|          | Mutant allele-specific    | aggaagttcatgcccaccgccgtctcgtggatca |                    |                      |                    |
|          | Wild type allele specific | aggaagttcatgcccaccgccgtctcgtggatct |                    |                      |                    |
| c.551C>T | Common primer             | acctggagaggcacagacacggctcttag      | 250                | 58                   | 45                 |
|          | Mutant allele-specific    | atgcgctctggaggaggtaggc gatga       |                    |                      |                    |
|          | Wild-type allele-specific | atgcgctctggaggaggtaggc gatgg       |                    |                      |                    |
